# Supplementary material for: Minichromosome maintenance gene family: potential therapeutic targets and prognostic biomarkers for lung squamous cell carcinoma
Source: Aging (Albany NY). 2022 Nov 28;14(22):9167–85. doi: 10.18632/aging.204399 (PMC9740372; doi:10.18632/aging.204399)
Supplement: Supplementary Table 1 [file aging-14-204399-s001.xlsx]

## Sheet: Sheet1
Supplementary Table 1. The co-expression genes of the MCM family members.
Gene	Cytoband	Altered group	Unaltered group	Altered group	Unaltered group	Log Ratio	p-Value	q-Value
CNTD1	17q21.2-q21.31	4.86	4.39	0.86	0.76	0.48	0.0001609	0.998
TAS2R5	7q34	3	2.46	0.89	1.09	0.54	0.0003852	0.998
LY6G5B	6p21.33	5.33	4.84	0.91	0.94	0.49	0.0006361	0.998
PDXDC2P	16q22.1	7.32	6.82	1	0.9	0.5	0.0007107	0.998
CNGA3	2q11.2	0.68	1.22	1.01	1.07	-0.54	0.0007643	0.998
FCAMR	1q32.1	1.09	1.78	1.1	1.59	-0.69	0.0008405	0.998
N4BP2L2-IT2	13q13.1	4.58	4.07	0.96	1.03	0.5	0.0009271	0.998
AHSA2P	2p15	8.33	7.78	1.13	1.1	0.56	0.001142	0.998
POU5F1B	8q24.21	3.98	3.41	1.17	1.21	0.57	0.001642	0.998
TULP1	6p21.31	2.4	1.88	1.02	1.2	0.52	0.0022	0.998
ZNF280B	22q11.22	6.32	5.48	1.62	2.05	0.85	0.002417	0.998
CYP2D7	22q13.2	4.17	3.61	1.13	1.31	0.56	0.002429	0.998
MYO15B	17q25.1	7.62	6.99	1.32	1.44	0.63	0.002699	0.998
NSUN5P2	7q11.23	7.97	7.52	1.02	0.94	0.45	0.003004	0.998
SHC4	15q21.1	3.64	4.3	1.42	1.51	-0.66	0.003316	0.998
FIRRE	Xq26.2	4.67	3.96	1.5	1.68	0.71	0.003332	0.998
LINC01089	12q24.31	7.39	6.91	1.15	0.93	0.47	0.003532	0.998
ASMTL-AS1	Xp22.33 and Yp11.32	5.12	4.52	1.36	1.31	0.6	0.003592	0.998
ARX	Xp21.3	1.63	2.31	1.35	1.74	-0.68	0.003618	0.998
GOLGA8A	15q14	9.7	9.1	1.34	1.36	0.6	0.003628	0.998
HSPA4L	4q28.1	8.19	8.7	1.25	1	-0.51	0.00388	0.998
SPANXC	Xq27.2	0.33	0.96	1.08	1.79	-0.63	0.004031	0.998
DPY19L2	12q14.2	4.12	3.49	1.32	1.6	0.64	0.004136	0.998
CPT1B	22q13.33	7.86	7.41	1.06	0.99	0.45	0.004323	0.998
USP32P1	17p11.2	6.69	5.95	1.68	1.71	0.74	0.004335	0.998
RASSF10	11p15.2	4.54	5.24	1.62	1.63	-0.7	0.004973	0.998
HOXD1	2q31.1	4.92	5.5	1.42	1.34	-0.58	0.00584	0.998
GABRE	Xq28	8.92	8.18	1.69	1.86	0.74	0.005842	0.998
FAM227A	22q13.1	5.16	4.72	1.03	1.1	0.45	0.00592	0.998
HSF4	16q22.1	6.25	5.78	1.13	1.12	0.47	0.005935	0.998
STAG3L1	7q11.23	6.02	5.54	1.03	1.29	0.48	0.00642	0.998
SPANXD	Xq27.2	0.2	0.7	0.58	1.66	-0.49	0.006741	0.998
ZFP28	19q13.43	6.65	6.08	1.26	1.56	0.58	0.006836	0.998
CD1C	1q23.1	4.47	5.09	1.56	1.45	-0.62	0.007468	0.998
HLA-DQB2	6p21.32	6.9	7.57	1.79	1.44	-0.67	0.007523	0.998
PABPC1L	20q13.12	7.68	7.22	1.12	1.16	0.47	0.007524	0.998
ATP6V1B1	2p13.3	5.91	5.19	1.76	1.83	0.73	0.007893	0.998
KLHL31	6p12.1	4.86	4.37	1.12	1.29	0.48	0.008063	0.998
FCGBP	19q13.2	7.75	8.51	1.96	1.87	-0.77	0.008964	0.998
MRGPRX3	11p15.1	1.61	2.34	1.62	2.11	-0.74	0.008996	0.998
H2BC9	6p22.2	4.66	4.01	1.65	1.59	0.64	0.009409	0.998
RIPPLY3	21q22.13	4.97	4.28	1.75	1.69	0.68	0.009475	0.998
GABRA2	4p12	0.83	1.39	1.12	1.73	-0.56	0.009811	0.998
SPANXA2	Xq27.2	0.21	0.73	0.82	1.73	-0.51	0.009823	0.998
TCF15	20p13	4.38	3.68	1.76	1.81	0.7	0.0104	0.998
ZNF470	19q13.43	6.63	6.15	0.98	1.47	0.48	0.0106	0.998
AHSG	3q27.3	2.24	2.89	1.61	1.7	-0.64	0.0108	0.998
WNK3	Xp11.22	4.28	3.64	1.5	1.85	0.64	0.0112	0.998
ZNF883	9q32	4.76	5.43	1.68	1.83	-0.68	0.0113	0.998
DSG1	18q12.1	4.75	5.71	2.57	2.4	-0.96	0.0116	0.998
SLC25A27	6p12.3	4.84	4.31	1.43	1.26	0.52	0.0116	0.998
GYG2	Xp22.33	6.98	6.52	1.1	1.32	0.46	0.0119	0.998
ERICH3	1p31.1	3.3	4.1	1.97	2.25	-0.8	0.012	0.998
CRP	1q23.2	0.74	1.27	1.24	1.54	-0.53	0.0124	0.998
CCL14	17q12	5.63	6.28	1.8	1.59	-0.65	0.013	0.998
HLA-DQA2	6p21.32	8.26	8.87	1.71	1.43	-0.6	0.013	0.998
ADAMTS1	21q21.3	9.57	10.05	1.33	1.2	-0.48	0.0132	0.998
CD1E	1q23.1	3.59	4.21	1.7	1.6	-0.62	0.0136	0.998
DOC2A	16p11.2	3.78	3.14	1.63	1.8	0.64	0.0138	0.998
PAX5	9p13.2	3.02	3.6	1.6	1.49	-0.58	0.0143	0.998
FER1L6	8q24.13	2.79	3.71	2.42	2.53	-0.92	0.0144	0.998
SORCS1	10q25.1	1.07	1.61	1.16	1.77	-0.54	0.0145	0.998
CHRNA3	15q25.1	3.15	3.63	1.25	1.36	-0.48	0.0147	0.998
ZNF582	19q13.43	4.57	4.09	1.25	1.36	0.48	0.0147	0.998
FAM131B	7q34	4.7	5.2	1.27	1.46	-0.5	0.0148	0.998
SOX14	3q22.3	0.3	0.83	0.83	1.93	-0.53	0.0151	0.998
HCN4	15q24.1	1.25	1.74	1.14	1.54	-0.49	0.0153	0.998
MYOCD	17p12	2.23	2.77	1.52	1.4	-0.54	0.0157	0.998
CETP	16q13	3.62	4.08	1.31	1.14	-0.45	0.0159	0.998
ACKR1	1q23.2	6.12	6.75	1.82	1.6	-0.63	0.0159	0.998
RELN	7q22.1	3.85	4.46	1.56	1.82	-0.61	0.0171	0.998
TLL2	10q24.1	4.08	4.67	1.47	1.8	-0.59	0.0175	0.998
TNFRSF25	1p36.31	6.8	6.34	1.37	1.16	0.46	0.0176	0.998
CD1A	1q23.1	4.93	5.63	1.96	1.92	-0.7	0.0177	0.998
HLA-DRB6	6p21.32	7.9	8.45	1.77	1.14	-0.55	0.0178	0.998
FBXL16	16p13.3	5.68	6.17	1.4	1.33	-0.49	0.0179	0.998
RTN1	14q23.1	6.02	6.52	1.46	1.3	-0.5	0.0182	0.998
DNAH10	12q24.31	3.75	4.33	1.49	1.76	-0.58	0.0183	0.998
ANKRD20A3P	9q21.11	3.07	3.52	1.13	1.4	-0.45	0.0183	0.998
CRMP1	4p16.2	7.41	8.02	1.64	1.8	-0.61	0.0189	0.998
FAM189A2	9q21.12	4.78	5.39	1.81	1.56	-0.61	0.0191	0.998
TDH	8p23.1	2.66	2.04	1.79	1.68	0.62	0.0194	0.998
ABCA8	17q24.2	4.37	5.03	1.96	1.7	-0.66	0.02	0.998
SVOPL	7q34	4.19	3.51	1.85	2.05	0.69	0.02	0.998
GOLGA8B	15q14	8.05	7.51	1.48	1.56	0.54	0.0201	0.998
WDR97	8q24.3	3.96	3.37	1.61	1.73	0.59	0.0202	0.998
SMC1B	22q13.31	3.73	2.99	2.16	2.03	0.74	0.0209	0.998
FEZF2	3p14.2	0.29	0.8	0.83	2.01	-0.52	0.0215	0.998
GPC2	7q22.1	4.99	4.47	1.43	1.57	0.52	0.0217	0.998
PLD5	1q43	2.28	2.95	1.83	2.03	-0.67	0.0219	0.998
MAP7D2	Xp22.12	6.55	5.75	2.27	2.34	0.8	0.0221	0.998
NGFR	17q21.33	7.55	8.26	2.1	2.02	-0.71	0.0231	0.998
CHRDL2	11q13.4	3.67	4.32	1.94	1.8	-0.65	0.0231	0.998
IGFL1	19q13.32	4.53	5.48	2.46	3.07	-0.95	0.0234	0.998
LINC01124	2q31.1	2.04	2.62	1.59	1.81	-0.58	0.0242	0.998
C1GALT1C1L	2p21	4.64	4.07	1.62	1.68	0.56	0.0243	0.998
SLC16A8	22q13.1	3.63	3.12	1.48	1.51	0.51	0.0244	0.998
FCN3	1p36.11	5.68	6.25	1.73	1.58	-0.57	0.0245	0.998
CALN1	7q11.22	2.5	1.66	2.67	2.18	0.84	0.0247	0.998
YJEFN3	19p13.11	5.45	4.97	1.38	1.42	0.48	0.0247	0.998
HS6ST3	13q32.1	2.37	3.15	2.18	2.39	-0.78	0.0248	0.998
IGFL3	19q13.32	1.46	2.15	1.76	2.28	-0.68	0.0249	0.998
CLEC10A	17p13.1	5.96	6.48	1.63	1.33	-0.51	0.0252	0.998
FCRL4	1q23.1	1.79	2.29	1.47	1.4	-0.49	0.0253	0.998
CR2	1q32.2	4.6	5.37	2.31	2.19	-0.77	0.0254	0.998
LINC00964	8q24.13	2.7	2.15	1.73	1.44	0.55	0.0255	0.998
ATP1A2	1q23.2	2.64	3.17	1.57	1.57	-0.53	0.0258	0.998
GRIN3B	19p13.3	2.63	3.23	1.71	1.83	-0.6	0.0259	0.998
ADGRV1	5q14.3	8.47	7.97	1.17	1.79	0.5	0.0259	0.998
FCER2	19p13.2	2.15	2.73	1.7	1.74	-0.58	0.0261	0.998
SDCBP2	20p13	7.94	8.46	1.44	1.69	-0.52	0.027	0.998
STAC	3p22.3-p22.2	4.91	5.48	1.62	1.8	-0.57	0.027	0.998
PCDH20	13q21.2	4.91	5.54	1.75	2.03	-0.63	0.0278	0.998
LRRC4B	19q13.33	4.15	4.62	1.17	1.65	-0.47	0.0285	0.998
POU3F2	6q16.1	1.51	2.27	1.94	2.68	-0.76	0.029	0.998
SP5	2q31.1	2.48	3.15	1.89	2.14	-0.67	0.029	0.998
LTB	6p21.33	6.67	7.13	1.38	1.39	-0.46	0.0293	0.998
GAD1	2q31.1	4.64	5.32	1.97	2.09	-0.67	0.0293	0.998
MPP4	2q33.1	1.72	2.28	1.53	1.84	-0.55	0.0294	0.998
DLK1	14q32.2	2.18	1.2	3.42	2.29	0.99	0.0298	0.998
TBX20	7p14.2	1.51	0.99	1.64	1.49	0.52	0.0298	0.998
PTGER1	19p13.1	2.11	2.59	1.41	1.51	-0.48	0.0298	0.998
NTSR1	20q13.33	1.44	1.94	1.52	1.57	-0.51	0.0303	0.998
ASTN2	9q33.1	5.99	6.52	1.57	1.62	-0.53	0.0306	0.998
BRINP3	1q31.1	1.96	2.53	1.63	1.87	-0.57	0.031	0.998
CRYM	16p12.2	3.93	4.62	2.07	2.15	-0.69	0.0311	0.998
PLA2G2A	1p36.13	4.17	4.89	2.3	2.03	-0.72	0.0314	0.998
SELE	1q24.2	5.16	5.84	2.09	2.03	-0.68	0.0315	0.998
ZBED2	3q13.13	6.14	6.68	1.71	1.59	-0.54	0.0315	0.998
ADAMTS15	11q24.3	3.98	4.61	1.89	1.99	-0.63	0.0322	0.998
CHI3L2	1p13.2	6.1	6.68	1.96	1.49	-0.58	0.0323	0.998
CHIA	1p13.2	1.88	2.56	1.92	2.29	-0.68	0.0323	0.998
C8ORF34	8q13.2	2.8	3.27	1.44	1.44	-0.47	0.0333	0.998
NKX2-8	14q13.3	3.76	4.33	1.72	1.8	-0.57	0.0337	0.998
PREX2	8q13.2	3.13	3.58	1.4	1.39	-0.45	0.0339	0.998
SUN3	7p12.3	0.84	1.35	1.48	1.67	-0.5	0.0344	0.998
TUBB3	16q24.3	9.33	9.82	1.52	1.51	-0.49	0.0345	0.998
IRX1	5p15.33	2.85	3.61	2.29	2.49	-0.77	0.0346	0.998
ZBED9	6p22.1	6.5	6.04	1.22	1.66	0.46	0.0351	0.998
SCML2	Xp22.13	6.05	5.5	1.63	1.82	0.55	0.0352	0.998
SYCP2L	6p24.2	3.33	2.61	2.3	2.17	0.72	0.0355	0.998
FADS6	17q25.1	4.47	3.74	2.27	2.35	0.74	0.0358	0.998
EREG	4q13.3	4.14	4.92	2.24	2.66	-0.77	0.0364	0.998
NAPSB	19q13.33	6.69	7.18	1.74	1.26	-0.49	0.037	0.998
SYT14	1q32.2	4.86	4.15	2.27	2.22	0.71	0.0375	0.998
CHODL	21q21.1	7.04	6.37	1.85	2.42	0.67	0.0377	0.998
PCSK5	9q21.13	6.71	7.22	1.7	1.46	-0.51	0.038	0.998
TCN1	11q12.1	4.21	5.15	2.79	3.17	-0.94	0.0381	0.998
TENM3-AS1	4q34.3	3.38	3.9	1.58	1.73	-0.52	0.0381	0.998
FAM181B	11q14.1	5.27	4.69	1.7	1.98	0.58	0.0385	0.998
NR2E1	6q21	1.6	2.18	1.63	2.07	-0.57	0.0397	0.998
GRIK2	6q16.3	3.16	3.8	1.99	2.07	-0.63	0.0398	0.998
TRDN	6q22.31	3.45	2.71	2.38	2.31	0.73	0.0399	0.998
ADAM11	17q21.31	4.22	3.75	1.36	1.65	0.47	0.04	0.998
PAX8-AS1	2q14.1	7.66	7.06	1.98	1.9	0.6	0.041	0.998
SORCS3	10q25.1	1.09	1.7	1.69	2.26	-0.61	0.0412	0.998
CLDN2	Xq22.3	3.93	4.48	1.77	1.77	-0.55	0.0415	0.998
CEMIP	15q25.1	9.33	9.79	1.45	1.51	-0.46	0.0415	0.998
NRXN2	11q13.1	5.02	5.6	1.94	1.76	-0.58	0.0418	0.998
SPANXB1	Xq27.1	0.36	0.84	1.16	1.93	-0.48	0.0419	0.998
IL1RL1	2q12.1	4.17	4.63	1.51	1.5	-0.46	0.0424	0.998
GCNT3	15q22.2	5.73	6.44	2.3	2.29	-0.71	0.0425	0.998
PAX8	2q14.1	6	5.5	1.6	1.63	0.5	0.0429	0.998
FAM25A	10q23.2	1.61	2.3	1.95	2.53	-0.68	0.0435	0.998
HTR2C	Xq23	5.02	4.34	2	2.46	0.68	0.0436	0.998
VAX1	10q25.3	3.36	2.68	2.16	2.31	0.68	0.0439	0.998
RP1	8q11.23-q12.1	1.92	2.44	1.53	1.93	-0.52	0.0443	0.998
MLXIPL	7q11.23	4.99	4.5	1.6	1.62	0.49	0.0449	0.998
PLD4	14q32.33	4.7	5.17	1.61	1.48	-0.47	0.045	0.998
CDH26	20q13.33	6.89	6.25	2.11	2.09	0.64	0.0454	0.998
TSPAN1	1p34.1	9.57	10.12	1.82	1.85	-0.56	0.0455	0.998
CCL23	17q12	2.58	3.04	1.54	1.46	-0.46	0.0457	0.998
PLAG1	8q12.1	7.57	7.1	1.55	1.53	0.47	0.0461	0.998
TNIP3	4q27	5.16	5.7	1.82	1.79	-0.55	0.0463	0.998
SDR16C5	8q12.1	7.41	8.03	2.15	1.93	-0.62	0.0466	0.998
IRX4	5p15.33	4.01	4.88	2.92	2.86	-0.87	0.0468	0.998
RORB	9q21.13	2.18	2.64	1.3	1.76	-0.46	0.0469	0.998
FDCSP	4q13.3	4.01	5	3.08	3.48	-0.98	0.0471	0.998
CD207	2p13.3	4.76	5.39	2.09	2.13	-0.63	0.0482	0.998
LCE1C	1q21.3	1.84	2.41	1.8	1.98	-0.57	0.0484	0.998
TNXB	6p21.33-p21.32	6.55	7.01	1.56	1.46	-0.46	0.0485	0.998
SV2B	15q26.1	5.43	6.12	2.26	2.35	-0.69	0.0489	0.998
MAGEC1	Xq27.2	1.96	2.9	2.91	3.41	-0.94	0.0494	0.998
CADM3	1q23.2	4.63	5.16	1.82	1.75	-0.53	0.0497	0.998
WNT16	7q31.31	3.39	4.04	1.85	2.55	-0.65	0.0499	0.998
LPO	17q22	2.66	2.17	1.62	1.62	0.48	0.0499	0.998
